# Supplementary material for: Experimental and theoretical studies of the gas-phase reactions of O(1D) with H2O and D2O at low temperature
Source: Royal Society of Chemistry journal article supplement (doi:10.1039/d1cp04614d), 2021-01-01
Supplement: d1cp04614d1.pdf [file d1cp04614d1.pdf]

Electronic supplementary information (ESI) for

## Experimental and Theoretical Studies of the Gas-Phase Reactions of O(<sup>1</sup>D) with H<sub>2</sub>O and D<sub>2</sub>O at Low Temperature

Kevin M. Hickson,<sup>a,b</sup> Somnath Bhowmick,<sup>c,d</sup> Yury V. Suleimanov,<sup>c</sup> João Brandão,<sup>e</sup> Daniela V. Coelho<sup>e</sup>

<sup>a</sup>Université de Bordeaux, Institut des Sciences Moléculaires, F-33400 Talence, France

<sup>b</sup>CNRS, Institut des Sciences Moléculaires, F-33400 Talence, France

<sup>c</sup>Computation-based Science and Technology Research Center, The Cyprus Institute, 20 Konstantinou Kavafi Street, Nicosia 2121, Cyprus

<sup>d</sup>Climate & Atmosphere Research Centre, The Cyprus Institute, 20 Konstantinou Kavafi Street, Nicosia 2121, Cyprus

<sup>e</sup>Departamento de Química e Farmácia – FCT, Universidade do Algarve, Campus de Gambelas, 8005-139 Faro, Portugal

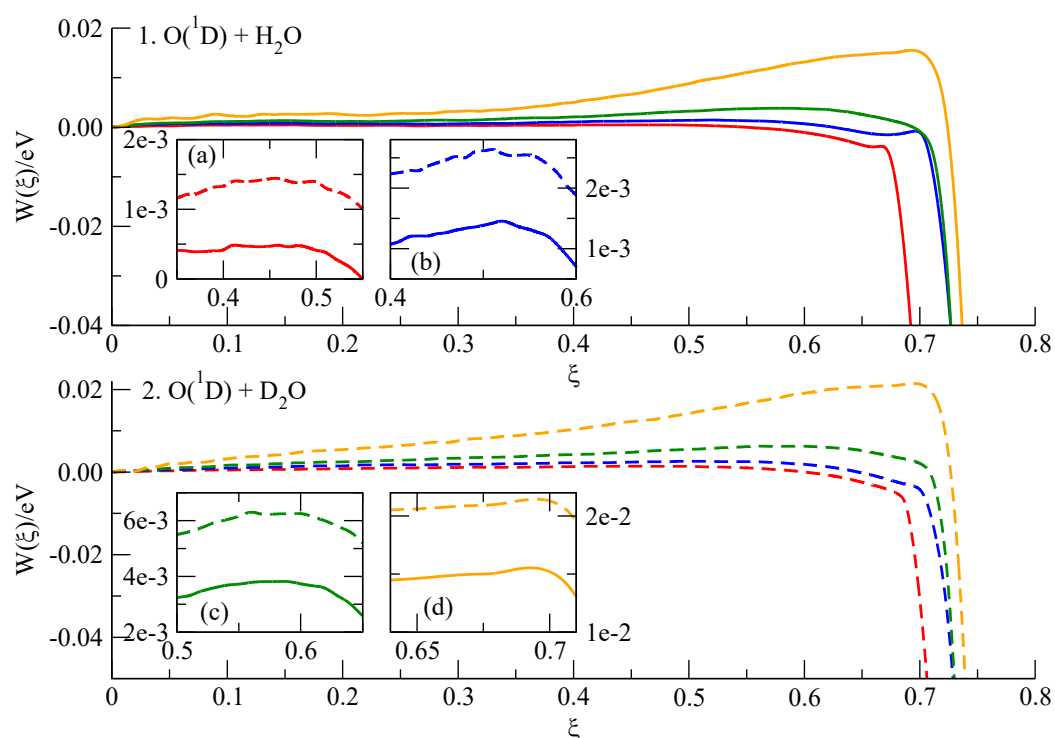

**Figure S1.** Ring polymer potentials of mean force ( $W(\xi)$ ) along the reaction coordinate for the 1. O(<sup>1</sup>D) + H<sub>2</sub>O (top panel, solid lines) 2. O(<sup>1</sup>D) + D<sub>2</sub>O (bottom panel, broken lines) chemical reactions on the X <sup>1</sup>A PES at 50 K (red), 75 K (blue), 127 K (green) and 296 K (orange). Inset plots (a)-(d) are the magnification of the barrier region in the PMF profile and show the comparison between the O(<sup>1</sup>D) + H<sub>2</sub>O and O(<sup>1</sup>D) + D<sub>2</sub>O reactions at a particular temperature.

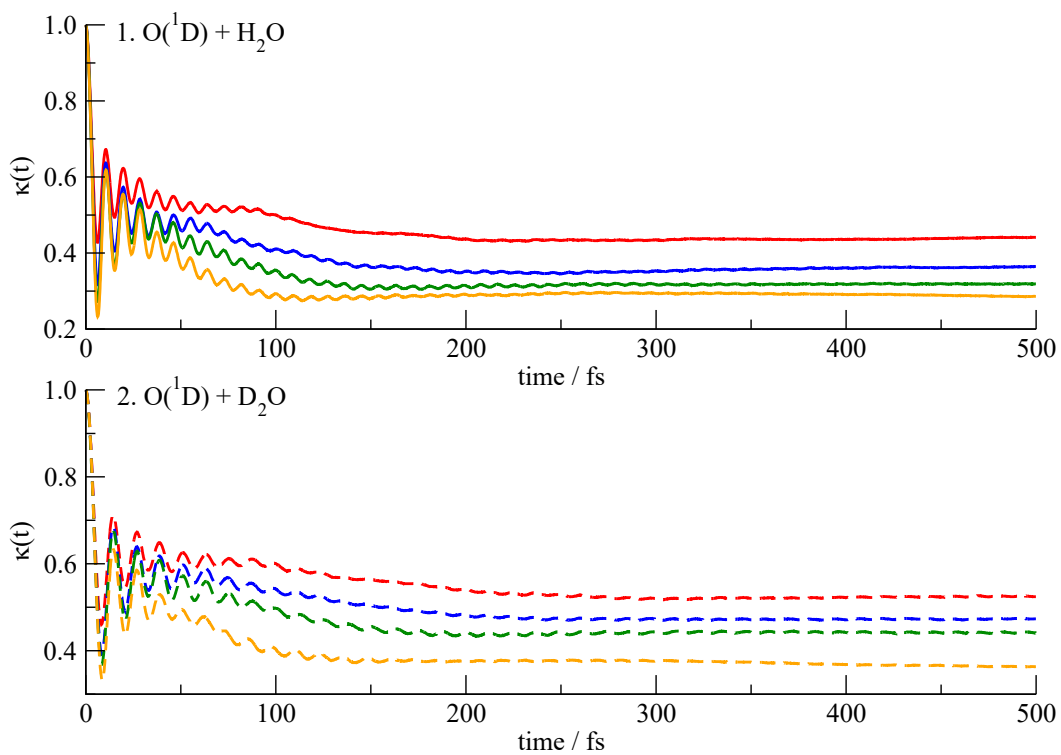

**Figure S2.** Ring polymer recrossing factor  $\kappa(t)$  for the 1. O(<sup>1</sup>D) + H<sub>2</sub>O (top panel, solid lines) 2. O(<sup>1</sup>D) + D<sub>2</sub>O (bottom panel, broken lines) chemical reactions on the X <sup>1</sup>A PES at 50 K (red), 75 K (blue), 127 K (green) and 296 K (orange).

**Table S1.** Input parameters for the RPMDrate calculations on the O(<sup>1</sup>D) + H<sub>2</sub>O/D<sub>2</sub>O reaction.

| Parameter                           | Reaction                              |                                       | Explanation <sup>a</sup>                                                 |
|-------------------------------------|---------------------------------------|---------------------------------------|--------------------------------------------------------------------------|
|                                     | O( <sup>1</sup> D) + H <sub>2</sub> O | O( <sup>1</sup> D) + D <sub>2</sub> O |                                                                          |
| PES                                 | X <sup>1</sup> A                      |                                       | [EN:JB:PCCP2017] <sup>b</sup>                                            |
| Command Line Parameters             |                                       |                                       |                                                                          |
| temp                                | 296                                   |                                       | temperature (K)                                                          |
|                                     | 127                                   |                                       |                                                                          |
|                                     | 75                                    |                                       |                                                                          |
|                                     | 50                                    |                                       |                                                                          |
| N <sub>beads</sub>                  | 64                                    |                                       | number of beads                                                          |
| Dividing Surface Parameters         |                                       |                                       |                                                                          |
| R <sub>∞</sub>                      | 15 Å                                  |                                       | dividing surface parameter (distance)                                    |
| N <sub>bond</sub>                   | 1                                     |                                       | number of forming and breaking bonds                                     |
| N <sub>channel</sub>                | 2                                     |                                       | number of equivalent product channels                                    |
| thermostat                          | “Andersen”                            |                                       | thermostat option                                                        |
| Biased Sampling Parameters          |                                       |                                       |                                                                          |
| N <sub>windows</sub>                | 111                                   |                                       | number of Windows                                                        |
| ξ <sub>1</sub>                      | -0.05                                 |                                       | center of the first window                                               |
| dξ                                  | 0.01                                  |                                       | window spacing step                                                      |
| ξ <sub>N</sub>                      | 1.05                                  |                                       | center of the last window                                                |
| dt                                  | 0.0001                                |                                       | time step (ps)                                                           |
| k <sub>i</sub>                      | 2.72                                  |                                       | umbrella force constant ((T/K) eV)                                       |
| N <sub>trajectory</sub>             | 100                                   |                                       | number of trajectories                                                   |
| t <sub>equilibration</sub>          | 20                                    |                                       | equilibration period (ps)                                                |
| t <sub>sampling</sub>               | 100                                   |                                       | sampling period in each trajectory (ps)                                  |
| Potential of Mean Force Calculation |                                       |                                       |                                                                          |
| ξ <sub>0</sub>                      | -0.02                                 |                                       | start of umbrella integration                                            |
| ξ                                   | 0.74                                  |                                       | end of umbrella integration                                              |
| N <sub>bins</sub>                   | 5000                                  |                                       | number of bins                                                           |
| Recrossing Factor Calculation       |                                       |                                       |                                                                          |
| dt                                  | 0.0001                                |                                       | time step (ps)                                                           |
| t <sub>equilibration</sub>          | 20                                    |                                       | equilibration period (ps) in the constrained (parent) trajectory         |
| N <sub>totalchild</sub>             | 100000                                |                                       | total number of unconstrained (child) trajectories                       |
| t <sub>childdata</sub>              | 2                                     |                                       | sampling increment along the parent trajectory (ps)                      |
| N <sub>child</sub>                  | 100                                   |                                       | number of child trajectories per one initially constrained configuration |
| t <sub>child</sub>                  | 0.5                                   |                                       | length of child trajectories (ps)                                        |

<sup>a</sup>The explanation of the format of the input file can be found in the RPMDrate code manual (<http://rpmdrate.cyi.ac.cy>).

<sup>b</sup>[EN:JB:PCCP2017] Enhanced PES derived from D. V. Coelho and J. Brandão, *Phys. Chem. Chem. Phys.* **19**, 1378-1388 (2017).

**Table S2.** Results of RPMD calculations for the O(<sup>1</sup>D) + H<sub>2</sub>O and O(<sup>1</sup>D) + D<sub>2</sub>O reactions over the X <sup>1</sup>A PESs at 50, 75, 127, and 296 K, including centroid-density quantum transition state theory rate constant ( $k_{\text{QTST}}$ ),<sup>a</sup> plateau value of the ring polymer transmission coefficients ( $\kappa(t \rightarrow \infty)$ ), final RPMD rate constant ( $k_{\text{RPMD}}$ ),<sup>a</sup> and the ratio between the O(<sup>1</sup>D) + H<sub>2</sub>O and O(<sup>1</sup>D) + D<sub>2</sub>O reaction rate constant ( $k_{\text{H}} / k_{\text{D}}$ ).

| $T$<br>(K) | Reaction                              | $k_{\text{QTST}}$     | $\kappa(t \rightarrow \infty)$ | $k_{\text{RPMD}}$ no correction (with correction) <sup>b</sup> | $k_{\text{H}} / k_{\text{D}}$ |
|------------|---------------------------------------|-----------------------|--------------------------------|----------------------------------------------------------------|-------------------------------|
| 296        | O( <sup>1</sup> D) + H <sub>2</sub> O | $3.31 \times 10^{-9}$ | 0.29                           | $9.45 \times 10^{-10}$ ( $1.89 \times 10^{-10}$ )              | 1.02                          |
|            | O( <sup>1</sup> D) + D <sub>2</sub> O | $2.56 \times 10^{-9}$ | 0.36                           | $9.30 \times 10^{-10}$ ( $1.86 \times 10^{-10}$ )              |                               |
| 127        | O( <sup>1</sup> D) + H <sub>2</sub> O | $2.80 \times 10^{-9}$ | 0.32                           | $8.96 \times 10^{-10}$ ( $1.79 \times 10^{-10}$ )              | 0.93                          |
|            | O( <sup>1</sup> D) + D <sub>2</sub> O | $2.19 \times 10^{-9}$ | 0.44                           | $9.64 \times 10^{-10}$ ( $1.93 \times 10^{-10}$ )              |                               |
| 75         | O( <sup>1</sup> D) + H <sub>2</sub> O | $2.44 \times 10^{-9}$ | 0.36                           | $8.91 \times 10^{-10}$ ( $1.78 \times 10^{-10}$ )              | 0.95                          |
|            | O( <sup>1</sup> D) + D <sub>2</sub> O | $1.99 \times 10^{-9}$ | 0.47                           | $9.40 \times 10^{-10}$ ( $1.88 \times 10^{-10}$ )              |                               |
| 50         | O( <sup>1</sup> D) + H <sub>2</sub> O | $2.23 \times 10^{-9}$ | 0.44                           | $9.84 \times 10^{-10}$ ( $1.97 \times 10^{-10}$ )              | 1.08                          |
|            | O( <sup>1</sup> D) + D <sub>2</sub> O | $1.74 \times 10^{-9}$ | 0.52                           | $9.14 \times 10^{-10}$ ( $1.83 \times 10^{-10}$ )              |                               |

<sup>a</sup>All rate constants are given in cm<sup>3</sup> s<sup>-1</sup>.

<sup>b</sup>Corrected by electronic partition functions  $Q_{\text{el}} = 5$ .
